# Supplementary material for: Allogeneic stem cell transplantation using HLA-matched donors for acute myeloid leukemia with deletion 5q or monosomy 5: a study from the Acute Leukemia Working Party of the EBMT
Source: PubMed Central journal article supplement — Haematologica. 2019 May 2;105(2):414–23. doi: 10.3324/haematol.2019.216168 (PMC7012466; doi:10.3324/haematol.2019.216168), 2020-02
Supplement: 2019.216168.POIRE_SUPPL.pdf [file 2019.216168.POIRE_SUPPL.pdf]

# Allogeneic stem cell transplantation using HLA-matched donors for acute myeloid leukemia with deletion 5q or monosomy 5: a study from the Acute Leukemia Working Party of the EBMT

Xavier Poiré,<sup>1</sup> Myriam Labopin,<sup>2,3,4,5</sup> Emmanuelle Polge,<sup>2,3,4,5</sup> Edouard Forcade,<sup>6</sup> Arnold Ganser,<sup>7</sup> Liisa Volin,<sup>8</sup> Mauricette Michallet,<sup>9</sup> Didier Blaise,<sup>10</sup> Ibrahim Yakoub-Agha,<sup>11</sup> Johan Maertens,<sup>12</sup> Carlos Richard Espiga,<sup>13</sup> Jan Cornelissen,<sup>14</sup> Jürgen Finke,<sup>15</sup> Mohamad Mohty,<sup>2,3,4,5\*</sup> Jordi Esteve<sup>16\*</sup> and Arnon Nagler<sup>2,3,17\*</sup>

<sup>1</sup>Section of Hematology, Cliniques Universitaires St-Luc, Brussels, Belgium; <sup>2</sup>Acute Leukemia Working Party of the EBMT; <sup>3</sup>Sorbonne Université, Paris, France; <sup>4</sup>INSERM UMR 938, Paris, France; <sup>5</sup>Service d'Hématologie, Hôpital Saint-Antoine, Paris, France; <sup>6</sup>CHU Bordeaux, Hôpital Haut-Leveque, Pessac, France; <sup>7</sup>Department of Hematology, Hemostasis, Oncology and Stem Cell Transplantation, Hannover Medical School, Hannover, Germany; <sup>8</sup>HUCH Comprehensive Cancer Center, Stem Cell Transplantation Unit, Helsinki, Finland; <sup>9</sup>Service d'Hématologie, Centre Hospitalier Lyon Sud, Lyon, France; <sup>10</sup>Institut Paoli Calmette, Programme de Transplantation Thérapie Cellulaire, Marseille, France; <sup>11</sup>CHU de Lille, LIRIC INSERM U995, Université Lille2, Lille, France; <sup>12</sup>University Hospital Gasthuisberg, Leuven, Belgium; <sup>13</sup>Servicio de Hematológica-Hemoterapia, Hospital U. Marqués de Valdecilla, Santander, Spain; <sup>14</sup>Department of Hematology, Erasmus MC Cancer Institute, Rotterdam, the Netherlands; <sup>15</sup>Department of Medicine-Hematology-Oncology, University of Freiburg, Freiburg, Germany; <sup>16</sup>Hematology Department, Hospital Clinic, Barcelona, Spain and <sup>17</sup>Chaim Sheba Medical Center, Tel-Hashomer, Israel.

\*MM, JE and AN contributed equally to this work.

©2020 Ferrata Storti Foundation. This is an open-access paper. doi:10.3324/haematol.2019.216168

Received: January 7, 2019.

Accepted: April 24, 2019.

Pre-published: May 2, 2019.

Correspondence: XAVIER POIRÉ - xavier.poire@uclouvain.be

**Supplement Figure 1: Relapse incidence (RI), non-relapse mortality (NRM), leukemia-free survival (LFS) and overall survival (OS) in the entire cohort.**

The 2-year cumulative incidence of relapse was 59.9% [95% CI: 55.3-64.2] (A). The 2-year probability of NRM was 19.9% [95% CI: 16.4-23.7] (B). The 2-year probability of LFS was 20.2% [95% CI: 16.4-23.9] (C) and the 2-year probability of OS was 27% [95% CI: 22.8-31.2] (D).

**Supplemental Figure 2: Graft-versus-host and relapse free survival (GRFS) by cytogenetic groups.**

The 2-year probability of GRFS was 26.5% [95% CI: 13-39.9] for the “none group”, 17% [95% CI: 8.5-25.4] for the “CK group”, 14.2% [95% CI: 8.7-19.7] for the “MK group” and only 6.6% [95% CI: 2.8-10.4] for the “abn(17p) group” ( $p < 0.001$ ).

## Supplemental Figure 1

Relapse incidence (RI), non-relapse mortality (NRM), leukemia-free survival (LFS) and overall survival (OS) in the entire cohort.

**A**

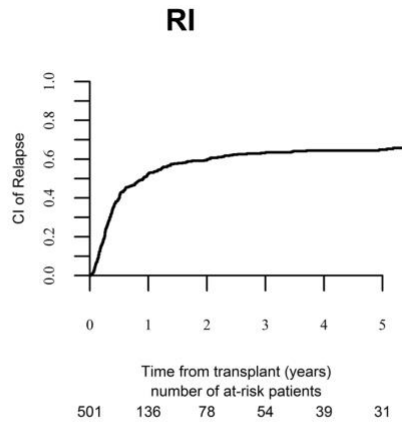

**B**

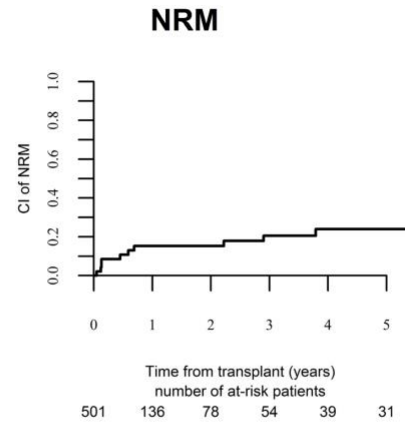

**C**

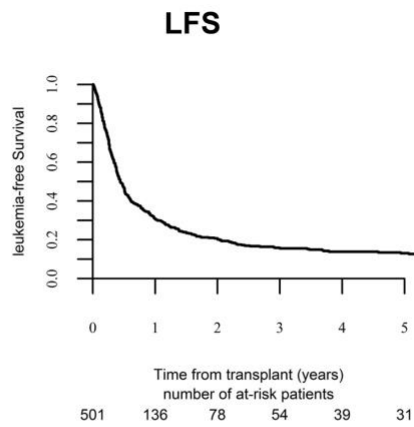

**D**

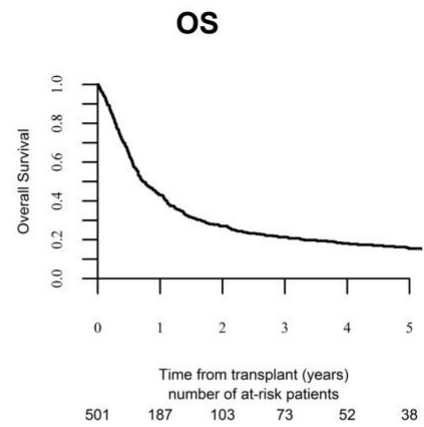

## Supplemental Figure 2

Graft-versus-host and relapse free survival (GRFS) by cytogenetic groups.

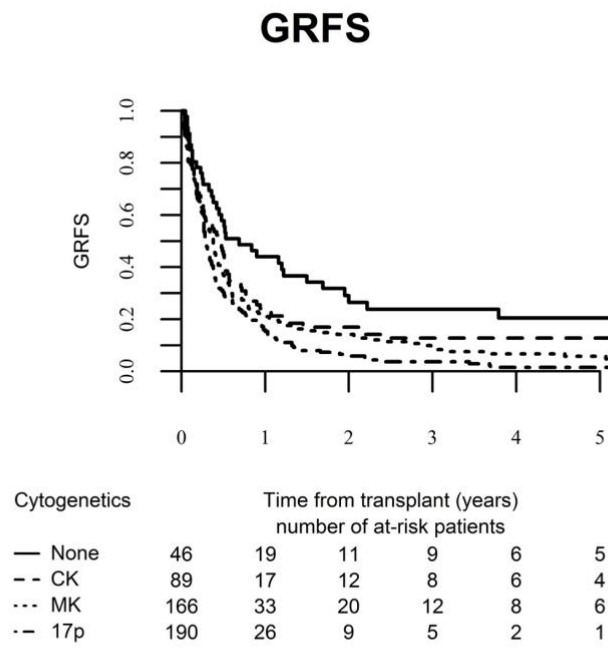

**Supplemental Table 1**  
**Multivariate analysis using a Cox proportional hazard model in the entire cohort for RI, NRM, OS and LFS.**  
**Only variables with a p<0.05 in univariate analysis were included in this analysis**

|                                 | p-value  | HR   | 95% CI    |
|---------------------------------|----------|------|-----------|
| <b>RI</b>                       |          |      |           |
| <i>Age (per 10 year)</i>        | 0.67     | 1.03 | 0.91-1.16 |
| <i>MUD versus MSD</i>           | 0.58     | 0.93 | 0.73-1.19 |
| <i>Active disease versus CR</i> | <0.0001  | 1.75 | 1.33-2.29 |
| <i>KPS ≥ 80%</i>                | 0.05     | 0.62 | 0.39-0.99 |
| <i>RIC versus MAC</i>           | 0.14     | 1.22 | 0.93-1.6  |
| <i>MK</i>                       | 0.005    | 1.52 | 1.14-2.05 |
| <i>CK</i>                       | 0.25     | 1.28 | 0.84-1.95 |
| <i>Abn(17p)</i>                 | 0.07     | 1.26 | 0.98-1.63 |
| <b>NRM</b>                      |          |      |           |
| <i>Age (per 10 year)</i>        | 0.0007   | 1.48 | 1.18-1.85 |
| <i>MUD versus MSD</i>           | 0.002    | 2.08 | 1.32-3.27 |
| <i>Active disease versus CR</i> | 0.0015   | 2.03 | 1.31-3.14 |
| <i>KPS ≥ 80%</i>                | 0.21     | 0.60 | 0.27-1.33 |
| <i>RIC versus MAC</i>           | 0.22     | 0.75 | 0.48-1.19 |
| <i>MK</i>                       | 0.60     | 1.14 | 0.71-1.83 |
| <i>CK</i>                       | 0.97     | 0.99 | 0.53-1.84 |
| <i>Abn(17p)</i>                 | 0.16     | 1.37 | 0.88-2.13 |
| <b>LFS</b>                      |          |      |           |
| <i>Age (per 10 year)</i>        | 0.03     | 1.12 | 1.01-1.25 |
| <i>MUD versus MSD</i>           | 0.26     | 1.13 | 0.91-1.39 |
| <i>Active disease versus CR</i> | <0.0001  | 1.82 | 1.45-2.29 |
| <i>KPS ≥ 80%</i>                | 0.03     | 0.63 | 0.42-0.94 |
| <i>RIC versus MAC</i>           | 0.54     | 1.08 | 0.85-1.35 |
| <i>MK</i>                       | 0.008    | 1.4  | 1.09-1.8  |
| <i>CK</i>                       | 0.35     | 1.18 | 0.83-1.67 |
| <i>Abn(17p)</i>                 | 0.02     | 1.29 | 1.04-1.61 |
| <b>OS</b>                       |          |      |           |
| <i>Age (per 10 year)</i>        | 0.007    | 1.16 | 1.04-1.30 |
| <i>MUD versus MSD</i>           | 0.14     | 1.18 | 0.95-1.46 |
| <i>Active disease versus CR</i> | <0.00001 | 1.86 | 1.47-2.35 |
| <i>KPS ≥ 80%</i>                | 0.03     | 0.64 | 0.43-0.96 |
| <i>RIC versus MAC</i>           | 0.6      | 1.06 | 0.84-1.35 |
| <i>MK</i>                       | 0.03     | 1.34 | 1.03-1.73 |
| <i>CK</i>                       | 0.06     | 1.43 | 0.99-2.05 |
| <i>Abn(17p)</i>                 | 0.04     | 1.27 | 1.01-1.59 |
| -7/7q-                          |          |      |           |

Abbreviations: HR: hazard ratio; CI: confidence interval; RI: relapse incidence; MUD: matched unrelated donor; MSD: matched sibling donor; CR: complete remission; KPS: Karnofsky performance status; RIC: reduced-intensity conditioning; MAC: myeloablative conditioning; abn(17p):

abnormalities of chromosome 17p; -7/7q-: monosomy 7 or deletion 7q; CK: complex karyotype; MK: monosomal karyotype; NRM: non relapse mortality; LFS: leukemia-free survival; OS: overall survival

**Supplemental Table 2**  
**Multivariate analysis using a Cox proportional hazard model in the entire cohort for grade II-IV aGvHD, cGvHD and GRFS.**  
**Only variables with a p<0.05 in univariate analysis were included in this analysis**

|                                 | p-value | HR   | 95% CI    |
|---------------------------------|---------|------|-----------|
| <b>Grade II-IV aGvHD</b>        |         |      |           |
| <i>Age (per 10 year)</i>        | 0.93    | 1.01 | 0.84-1.12 |
| <i>MUD versus MSD</i>           | 0.03    | 1.48 | 1.03-2.13 |
| <i>Active disease versus CR</i> | 0.003   | 1.74 | 1.20-2.52 |
| <i>KPS ≥ 80%</i>                | 0.79    | 1.10 | 0.53-2.31 |
| <i>RIC versus MAC</i>           | 0.74    | 0.94 | 0.63-1.39 |
| <i>MK</i>                       | 0.64    | 1.11 | 0.72-1.70 |
| <i>CK</i>                       | 0.81    | 1.08 | 0.59-1.96 |
| <i>Abn(17p)</i>                 | 0.31    | 1.21 | 0.83-1.77 |
| <b>cGvHD</b>                    |         |      |           |
| <i>Age (per 10 year)</i>        | 0.08    | 1.18 | 0.98-1.43 |
| <i>MUD versus MSD</i>           | 0.92    | 1.02 | 0.70-1.49 |
| <i>Active disease versus CR</i> | 0.73    | 1.09 | 0.68-1.74 |
| <i>KPS ≥ 80%</i>                | 0.54    | 0.75 | 0.29-1.91 |
| <i>RIC versus MAC</i>           | 0.47    | 0.85 | 0.55-1.31 |
| <i>MK</i>                       | 0.57    | 0.88 | 0.57-1.36 |
| <i>CK</i>                       | 0.45    | 1.24 | 0.71-2.16 |
| <i>Abn(17p)</i>                 | 0.10    | 1.42 | 0.93-2.16 |
| <b>GRFS</b>                     |         |      |           |
| <i>Age (per 10 year)</i>        | 0.01    | 1.14 | 1.03-1.26 |
| <i>MUD versus MSD</i>           | 0.18    | 1.15 | 0.94-1.41 |
| <i>Active disease versus CR</i> | <0.0001 | 1.65 | 1.32-2.06 |
| <i>KPS ≥ 80%</i>                | 0.042   | 0.67 | 0.45-0.99 |
| <i>RIC versus MAC</i>           | 0.76    | 1.04 | 0.83-1.30 |
| <i>MK</i>                       | 0.072   | 1.25 | 0.98-1.58 |
| <i>CK</i>                       | 0.12    | 1.30 | 0.93-1.81 |
| <i>Abn(17p)</i>                 | 0.047   | 1.25 | 1.00-1.55 |

Abbreviations: HR: hazard ratio; CI: confidence interval; aGvHD: acute graft-versus-host disease; MUD: matched unrelated donor; MSD: matched sibling donor; CR: complete remission; KPS: Karnofsky performance status, RIC: reduced-intensity conditioning; MAC: myeloablative conditioning; abn(17p): abnormalities of chromosome 17p; -7/7q-: monosomy 7 or deletion 7q; CK: complex karyotype; MK: monosomal karyotype; cGvHD: chronic graft-versus-host disease; GRFS: graft-versus-host and relapse-free survival.

**Supplemental Table 3**  
**Patients' characteristics by cytogenetic subgroups**

|                                           | <b>5q sole<br/>N=47</b> | <b>CK<br/>N=90</b> | <b>MK<br/>N=169</b> | <b>Abn(17p)<br/>N=193</b> | <b>p-values</b> |
|-------------------------------------------|-------------------------|--------------------|---------------------|---------------------------|-----------------|
| Median follow-up (range)                  | 37 months (3-163)       | 21 months (3-147)  | 27 months (2-173)   | 27 months (2-173)         |                 |
| Median age (range)                        | 50 yo (18-71)           | 55 yo (19-75)      | 56 yo (20-73)       | 55 yo (22-71)             | 0.35            |
| Median time from diagnosis to SCT (range) | 6 months (4-8)          | 5 months (4-6)     | 5 months (4-6)      | 5 months (4-6)            | 0.11            |
| Median year of SCT (range)                | 2010 (2001-2015)        | 2010 (2000-2015)   | 2009 (2000-2015)    | 2010 (2000-2015)          | 0.01            |
| Disease status, N (%)                     |                         |                    |                     |                           |                 |
| CR1                                       | 38 (81%)                | 55 (61%)           | 114 (67%)           | 130 (67%)                 | 0.34            |
| CR2/CR3                                   | 2 (4%)                  | 5(6%)              | 5 (3%)              | 9 (5%)                    |                 |
| Active disease                            | 7 (15%)                 | 30 (33%)           | 50 (30%)            | 54 (28%)                  |                 |
| Secondary AML, N (%)                      | 6 (13%)                 | 21 (23%)           | 35 (21%)            | 41 (21%)                  | 0.53            |
| MSD/MUD, N (%)                            | 16/31 (35%/66%)         | 41/49 (46%/54%)    | 87/82 (51%/49%)     | 79/114 (41%/59%)          | 0.09            |
| Gender (M/F), N (%)                       | 21/26 (45%/55%)         | 52/38 (58%/42%)    | 100/69 (59%/41%)    | 98/95 (51%/49%)           | 0.19            |
| KPS $\geq$ 80%, N (%)                     | 44 (94%)                | 82 (95%)           | 148 (94%)           | 171 (91%)                 | 0.14            |
| MAC/RIC, N (%)                            | 27/20 (58%/42%)         | 39/51 (43%/57%)    | 80/89 (47%/53%)     | 76/117 (39%/61%)          | 0.12            |
| BM/PB, N (%)                              | 9/38 (19%/81%)          | 14/76 (16%/86%)    | 33/136 (20%/80%)    | 26/167 (13%/87%)          | 0.44            |
| In vivo TCD, N (%)                        | 29 (62%)                | 54 (61%)           | 85 (51%)            | 114 (59%)                 | 0.25            |

Abbreviations: N: number; CK: complex karyotype; MK: monosomal karyotype; abn(17p): abnormalities of chromosome 17p; yo: year-old; SCT: stem cell transplantation; CR1: first remission; CR2/CR3: subsequent remission; AML: acute myeloid leukemia; MSD: matched sibling donor; MUD: matched unrelated donor; M: male; F: female; KPS: Karnofsky performance status; MAC: myeloablative conditioning; RIC: reduced-intensity conditioning; BM: bone marrow; PB: peripheral blood; TCD: T-cell depletion.
