# Supplementary material for: Allogeneic stem cell transplantation using HLA-matched donors for acute myeloid leukemia with deletion 5q or monosomy 5: a study from the Acute Leukemia Working Party of the EBMT
Source: PubMed Central journal article supplement — Haematologica. 2019 May 2;105(2):414–23. doi: 10.3324/haematol.2019.216168 (PMC7012466; doi:10.3324/haematol.2019.216168), 2020-02
Supplement: 2019_216168-Disclosures_and_Contributions.pdf [file 2019_216168-Disclosures_and_Contributions.pdf]

Haematologica  
HAEMATOL/2019/216168  
Version 4

Allogeneic stem cell transplantation using HLA-matched donors for acute myeloid leukemia with deletion 5q or monosomy 5: a study from the Acute Leukemia Working Party of the EBMT.

Xavier Poiré, Myriam Labopin, Emmanuelle Polge, Edouard Forcade, Arnold Ganser, Liisa Volin, Mauricette Michallet, Didier Blaise, Ibrahim Yakoub-Agha, Johan Maertens, Carlos Richard Espiga, Jan Cornelissen, Jürgen Finke, Mohamad Mohty, Jordi Esteve, and Arnon Nagler

Collaborative Groups: Acute Leukemia Working Party of the EBMT)

Disclosures: All the authors declare no conflict-of-interest with the presented work.

Contributions: XP, MM, JE and AN wrote the manuscript; XP, ML, MM, JE and AN designed the study; XP, ML, MM, JE and AN analysed the data; EP, EF, AG, LV, MM, DB, IYA, JM, CRE, JC, JF provide the data and reviewed the manuscript.
